# Supplementary material for: Metabolomic and Transcriptomic Insights into Anthocyanin Biosynthesis in ‘Ziyan’ Tea Plants under Varied Photoperiod and Temperature Conditions
Source: MDPI journal article supplement (doi:10.3390/agronomy14010056), 2023-12-25
Supplement: s1 [file s1]

## Supplementary

Table S1. List of qRT-PCR primers

| Gene ID   | Gene name     | Primer sequence                                      |
|-----------|---------------|------------------------------------------------------|
| TGY031680 | <i>DFR</i>    | F: GACCGGAGCTTCAGGTTTCA<br>R: GGGCAAGTCCAAGAGATGCT   |
| TGY025428 | <i>HCTb</i>   | F: CAGGGGCGTCAATCTTCTCTT<br>R: ACCCCAAACCACTCTTGATGC |
| TGY000809 | <i>UGT29a</i> | F: CGCCAGATGGTCATGGATGT<br>R: CAAGTGGACCAACAGGGACA   |
| TGY008324 | <i>F3Ha</i>   | F: AGCCACATTCCAGAACCCAG<br>R: GGTTTTCTCCAAGTGCTGCTG  |
| TGY079101 | <i>CHS</i>    | F: ATGTGCACATACAACGCACC<br>R: GGCATGTCGACACCACTAGT   |
| TGY109805 | <i>HCTa</i>   | F: GGC GTTGCCAAGTGCTAAG<br>R: TAGACTCGTCCACGTCTGC    |
| TGY000843 | <i>UGT29b</i> | F: CATGTTACGAAACGCGGTG<br>R: TTGCGAGATCGTTTCATGGC    |

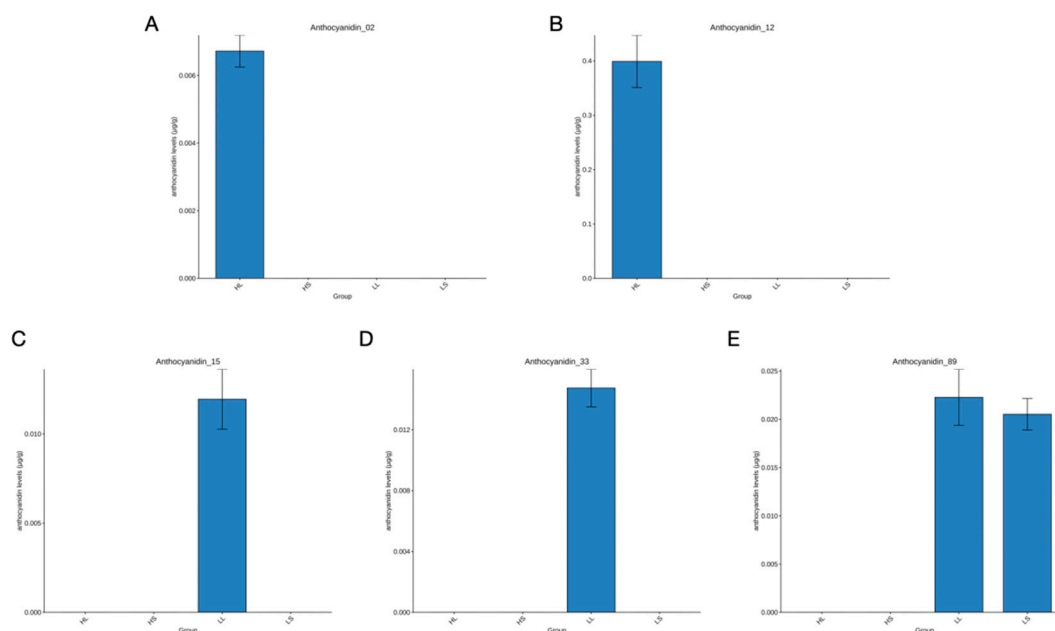

Figure S1. The specific anthocyanin types accumulated under certain treatments. (A) Cyanidin-3-O-rutinoside. (B) Cyanidin-3-(6"-caffeylsophoroside)-5-glucoside. (C) Cyanidin-3-O-sophoroside. (D) Delphinidin-3-O-sambubioside-5-O-glucoside. (E) Peonidin-3-O-sambubioside.
